# Supplementary material for: Context Specific and Differential Gene Co-expression Networks via Bayesian Biclustering
Source: PubMed Central journal article supplement (PMC4965098; doi:10.1371/journal.pcbi.1004791), 2016-07-28

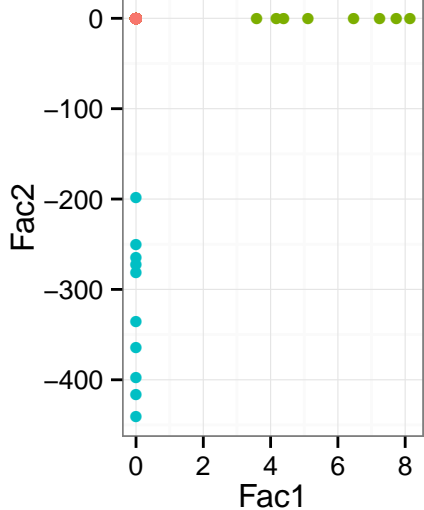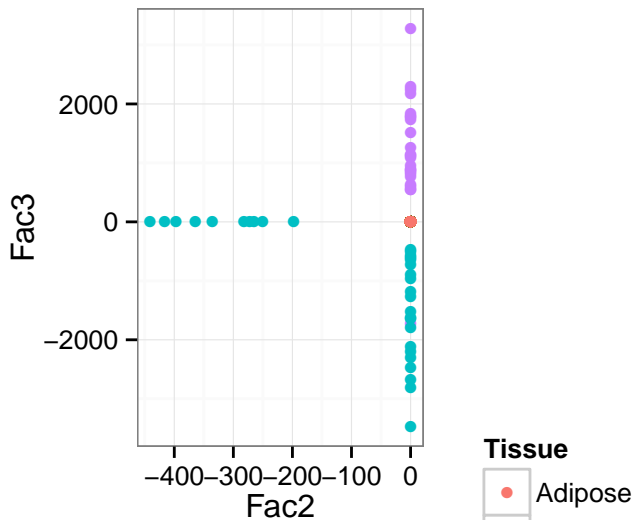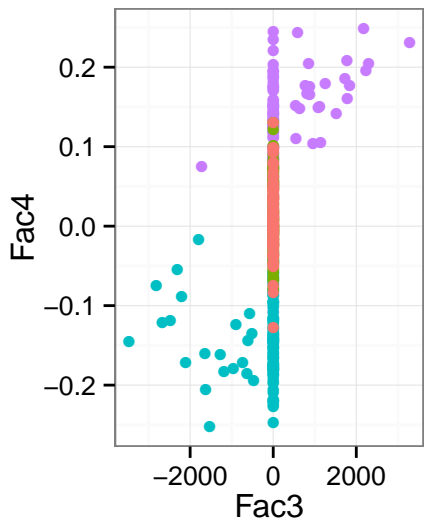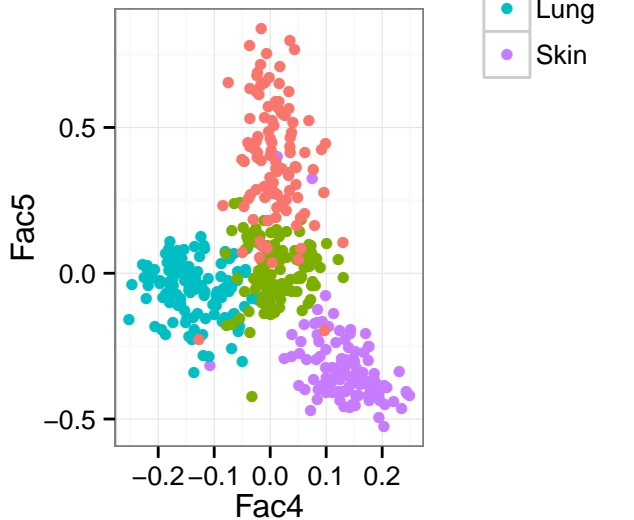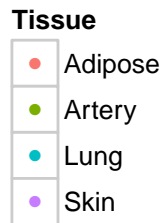

Supplement: pcbi.1004791.s013.pdf [file pcbi.1004791.s013.pdf]
